# Supplementary material for: Substrate modified thermal stability of mono- and few-layer MoS2
Source: Royal Society of Chemistry journal article supplement (doi:10.1039/c7nr08941d), 2018-01-01
Supplement: c7nr08941d1.pdf [file c7nr08941d1.pdf]

Supporting Information for

## Substrate modified thermal stability of mono- and few-layer MoS<sub>2</sub>

Xuewen Wang<sup>1, #</sup>, Wen Fan<sup>2, #</sup>, Ziwei Fan<sup>1</sup>, Wanyu Dai<sup>1</sup>, Kunlei Zhu<sup>1</sup>, Shengzhe Hong<sup>1</sup>, Yufei Sun<sup>1</sup>, Junqiao Wu<sup>2</sup>, Kai Liu<sup>1, \*</sup>

<sup>1</sup> State Key Laboratory of New Ceramics and Fine Processing, School of Materials Science and Engineering, Beijing 100084, China

<sup>2</sup> Department of Materials Science and Engineering, University of California, Berkeley, California 94720, USA

\* Corresponding author. E-mail: [liuk@tsinghua.edu.cn](mailto:liuk@tsinghua.edu.cn)

# These authors contributed equally to this work.

### 1. Experimental setup for thermal annealing

The exfoliated MoS<sub>2</sub> flakes on different substrates (mica, SiO<sub>2</sub>/Si, Al<sub>2</sub>O<sub>3</sub>) were pushed into the thermostatic zone of a quartz tube, heated to 250, 270, 290 and 300 °C at a rate of 20 °C /min, and then held for 15 minutes before opening the lid to cool. See the methods for details.

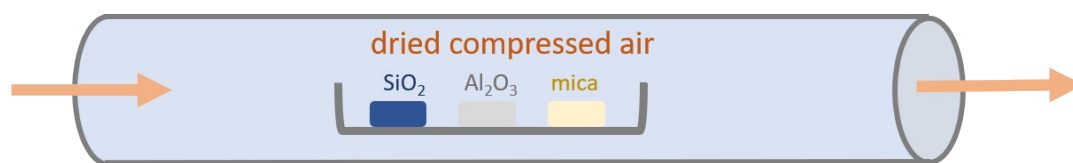

**Fig. S1** Schematic diagrams of the thermal annealing equipment setup.

### 2. Evidence of the presence of MoO<sub>3</sub> particles after thermal annealing

Comparing Fig. S2a and Fig. S2b, it was found that part of the bilayer region was thinned into a monolayer after thermal annealing at 290 °C. Meanwhile, particles appeared in the thinned area, as shown in Fig. S2c. These particles were most likely to be MoO<sub>3</sub>.

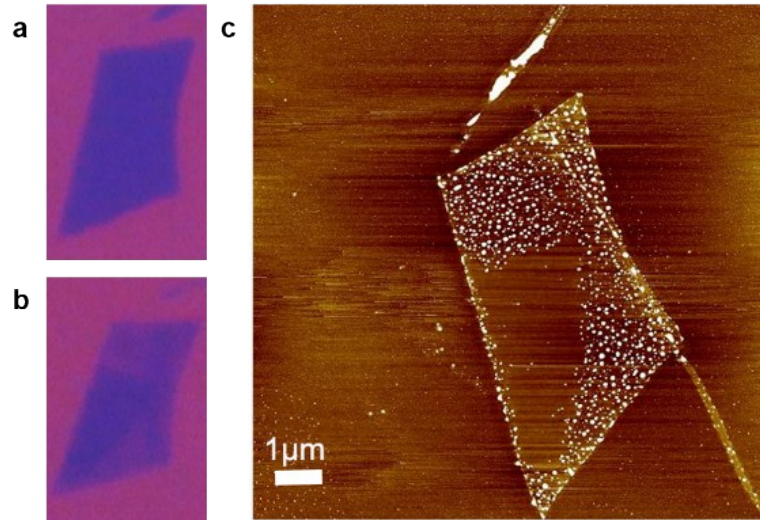

**Fig. S2** MoO<sub>3</sub> particles on SiO<sub>2</sub> substrate after thermal annealing. Optical images of a bilayer MoS<sub>2</sub> before **(a)** and after **(b)** annealed at 290 °C under 10 kPa pressure. **(c)** AFM topography image after the annealing at 290 °C.

### 3. Method of calculating the length of etching

Equation s1.1 shows the calculation of the average length of etched triangles, where L<sub>1</sub>, L<sub>2</sub> and L<sub>3</sub> represent the three side lengths of a triangle. Fig. S3 specifically describes the measurement of one of the triangles.

$$L = \frac{\{(L_1 + L_2 + L_3)_1 + (L_1 + L_2 + L_3)_2 + \dots + (L_1 + L_2 + L_3)_N\}}{3N} \quad (s 1.1)$$

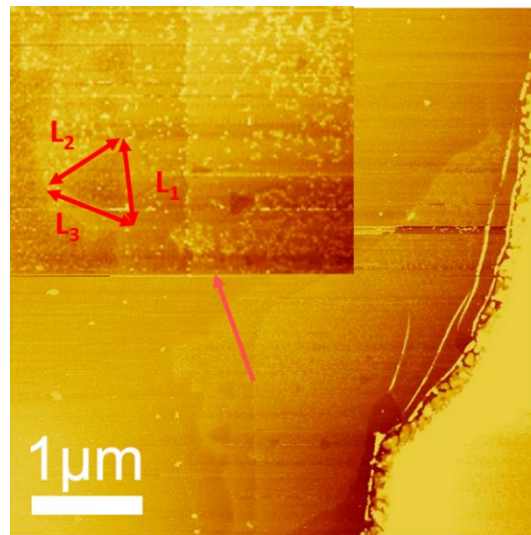

**Fig. S3** The calculation of average triangle length.

#### 4. Etching of MoS<sub>2</sub> flakes on mica substrate

Fig. S4a and S4b are microscopic images of MoS<sub>2</sub> flakes on mica before and after thermal annealing. After annealed at 270°C, many etched triangular pitches appeared on the monolayer MoS<sub>2</sub>, while the bilayer and multilayers MoS<sub>2</sub> remained less changed. Fig. S4c shows an AFM image of Fig. S4b, emphasizing the different etching behaviors between monolayer MoS<sub>2</sub> and multilayer MoS<sub>2</sub>.

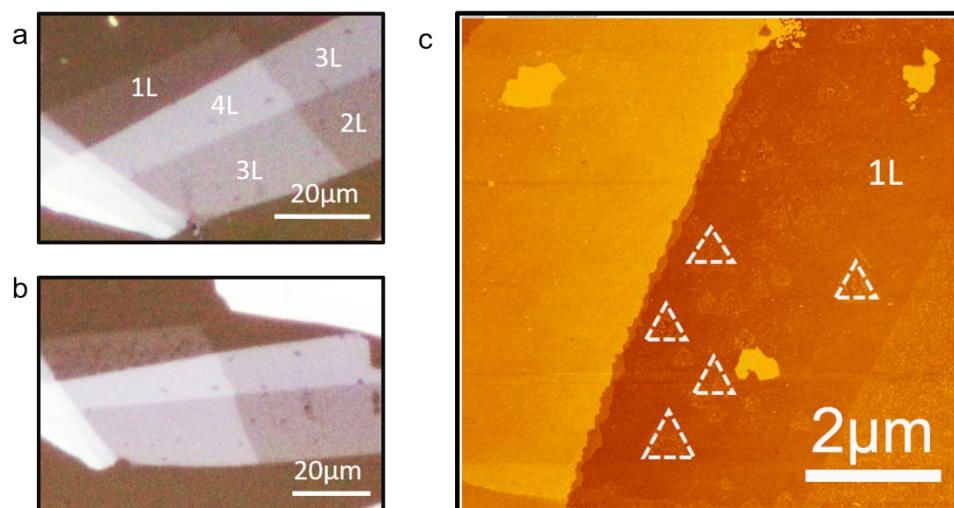

**Fig. S4** Optical images of MoS<sub>2</sub> on mica before (a) and after (b) annealed at 270 °C at 10 kPa pressure. (c) AFM topography image of MoS<sub>2</sub> on mica after annealed at 270 °C at 10 kPa pressure.

#### 5. Thicknesses of monolayer MoS<sub>2</sub> on different substrates

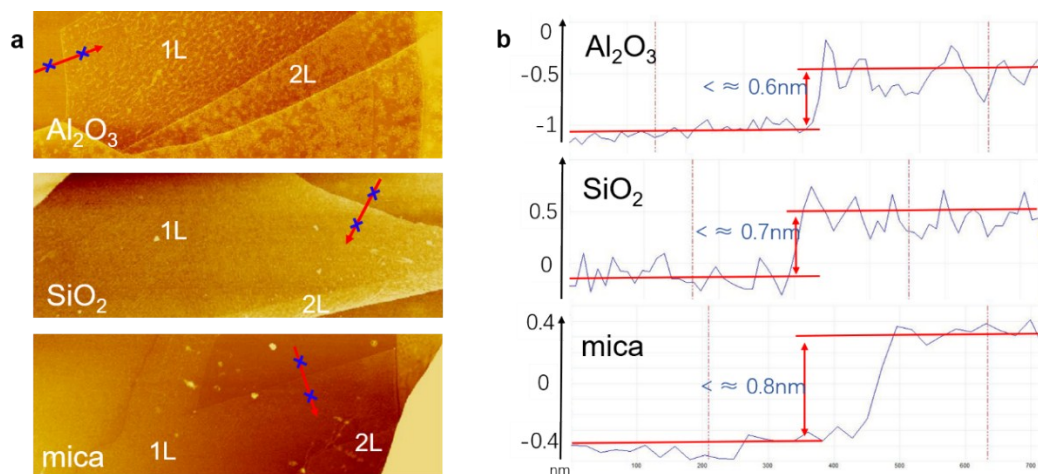

**Fig. S5** (a) AFM images and (b) height scanning curves of the monolayer MoS<sub>2</sub> on Al<sub>2</sub>O<sub>3</sub>, SiO<sub>2</sub> and mica substrates.

## 6. Determination of mica surface crystal orientation and composition

Referring to Fig. S6a, after comparison with the standard card, the mica we used was found to have a monoclinic crystalline structure, and the normal crystalline orientation is along the  $\langle 001 \rangle$  direction. Fig. S6c shows the XPS spectra of mica, with a detailed analysis of each peak; the content of each element in mica can be semi-quantitatively determined. Its chemical formula can be written as  $\text{KAl}_2 [\text{AlSi}_3\text{O}_{10}] [\text{OH}]_2$ .

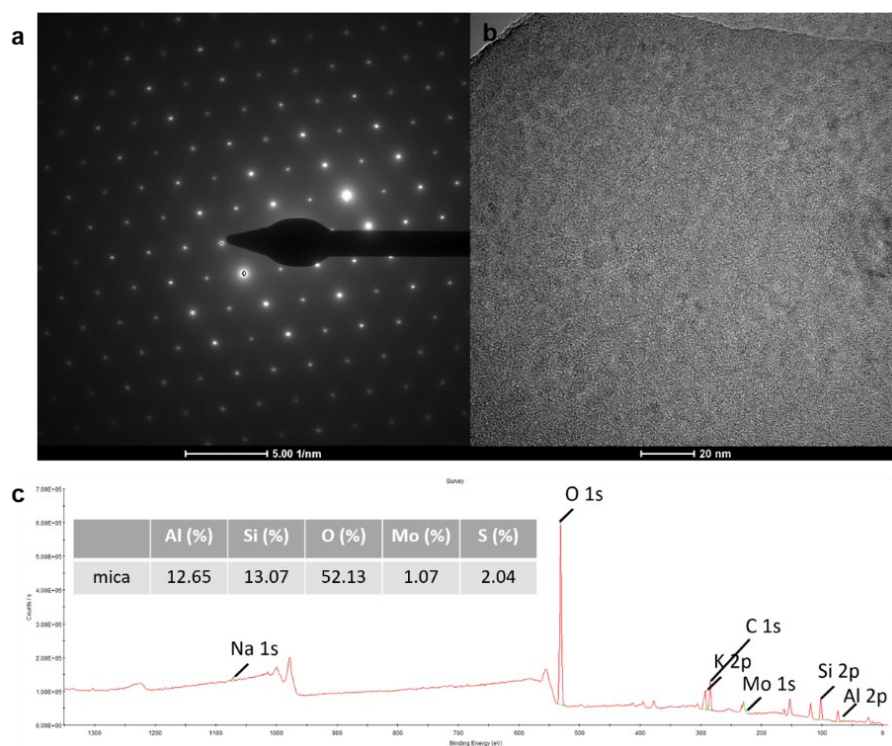

**Fig S6 (a)** Diffraction image and **(b)** SEM image of mica, demonstrating a monoclinic crystal of space group C2 with a (001) crystal plane, whose orientation is in the  $\langle 001 \rangle$  direction perpendicular to the crystal plane. **(c)** XPS measurement showed that the chemical formula of the mica used is  $\text{KAl}_2 [\text{AlSi}_3\text{O}_{10}] [\text{OH}]_2$ .

## 7. Schematic of mica crystal surface

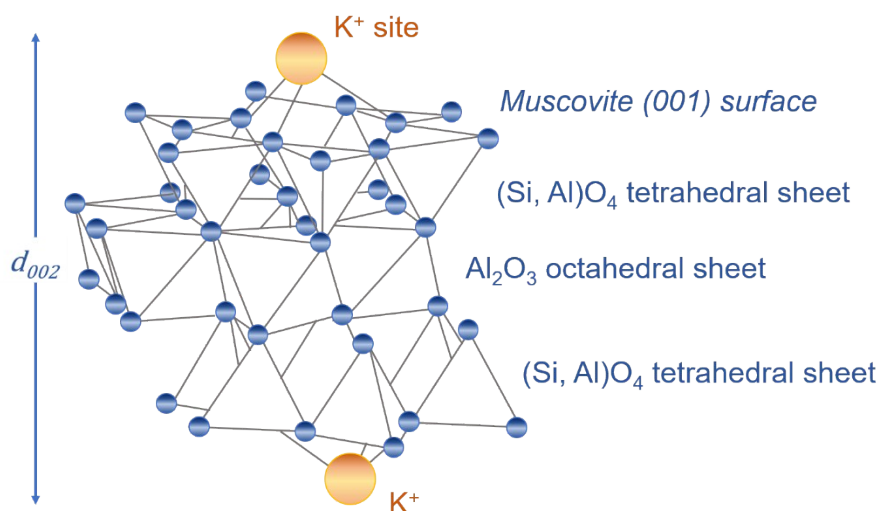

**Fig. S7** A schematic showing mica crystal (001) surface structure (referring to Cheng, et.al, Ref. 45 in the maintext).

### 8. Thermal etching of MoS<sub>2</sub> grown by chemical vapor deposition (CVD)

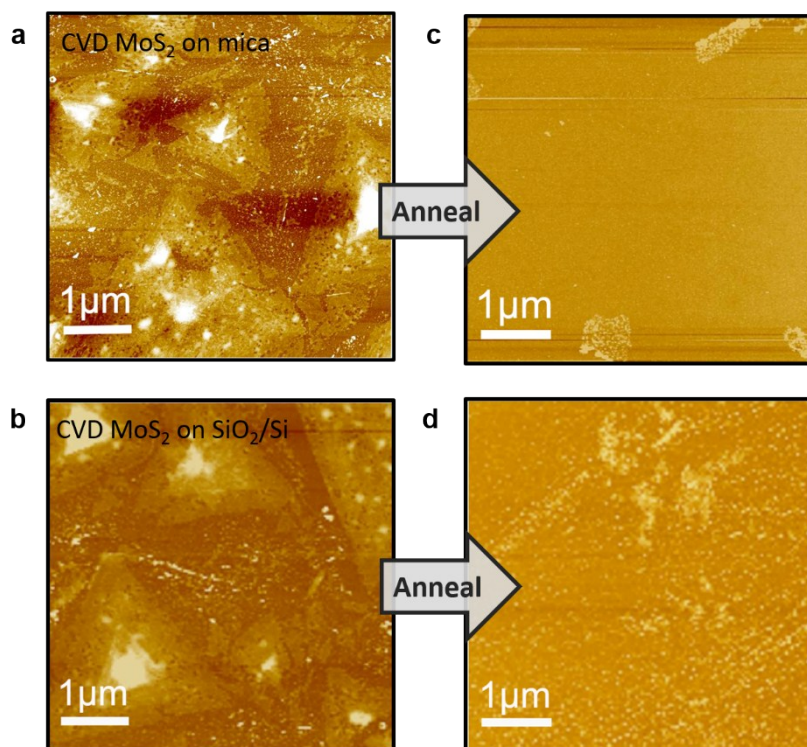

**Fig. S8** AFM topography images of CVD monolayer MoS<sub>2</sub>, which were originally grown on a SiO<sub>2</sub>/Si substrate and then transferred to mica **(a)** and SiO<sub>2</sub>/Si **(b)** substrates. After annealed at 240°C for 15min at atmospheric pressure, the monolayer MoS<sub>2</sub> flakes were almost completely etched both on mica **(c)** and on SiO<sub>2</sub>/Si **(d)** substrates.
